# Supplementary material
Source: publisher figshare collection journal article supplement (https://karger.figshare.com/ndownloader/files/38287116)
Supplement: Supplementary file 1 [file 38287116]

Supplementary Table 2. Comparison of the results of histologic and cytologic diagnoses

|  | **Histological Diagnosis** | | | | |
| --- | --- | --- | --- | --- | --- |
|  | Chronic cervicitis | LSIL | HSIL | SCC | Total |
| **SurePathTM (n=75)** |  |  |  |  |  |
| NILM | **1** | 1 | 0 | 0 | 2 (2.7%) |
| ASC-US | 2 | 8 | 2 | 0 | 12 (16.0%) |
| LSIL | 1 | **26** | 3 | 0 | 30 (40.0%) |
| ASC-H | 2 | 3 | 4 | 0 | 9 (12.0%) |
| HSIL | 1 | 1 | **15** | 4 | 21 (28.0%) |
| SCC | 0 | 0 | 0 | **1** | 1 (1.3%) |
| **WellPrep® (n=75)** |  |  |  |  |  |
| NILM | **1** | 2 | 1 | 0 | 4 (5.3%) |
| ASC-US | 3 | 16 | 4 | 0 | 23 (30.7%) |
| LSIL | 1 | **17** | 1 | 0 | 19 (25.3%) |
| ASC-H | 1 | 2 | 5 | 1 | 9 (12.0%) |
| HSIL | 1 | 2 | **13** | 3 | 19 (25.3%) |
| SCC | 0 | 0 | 0 | **1** | 1 (1.3%) |
| Total | 7 (9.3%) | 39 (52.0%) | 24 (32.0%) | 5 (6.7%) | 75 (100%) |

Abbreviations: ASC-US, Atypical squamous cells of undetermined significance; ASC-H, Atypical squamous cells cannot exclude an HSIL; HSIL, High-grade squamous intraepithelial lesion; LSIL, Low-grade squamous intraepithelial lesion; NILM, Negative for intraepithelial lesion or malignancy; SCC, Squamous cell carcinoma.
